# Supplementary material
Source: publisher figshare collection journal article supplement (https://tandf.figshare.com/ndownloader/files/14479541)
Supplement: Supplementary file 1 [file 14479541]

# Explanation Supplement for Compact Compton Camera

The details can be found in previous research, Refs 3 and 9.

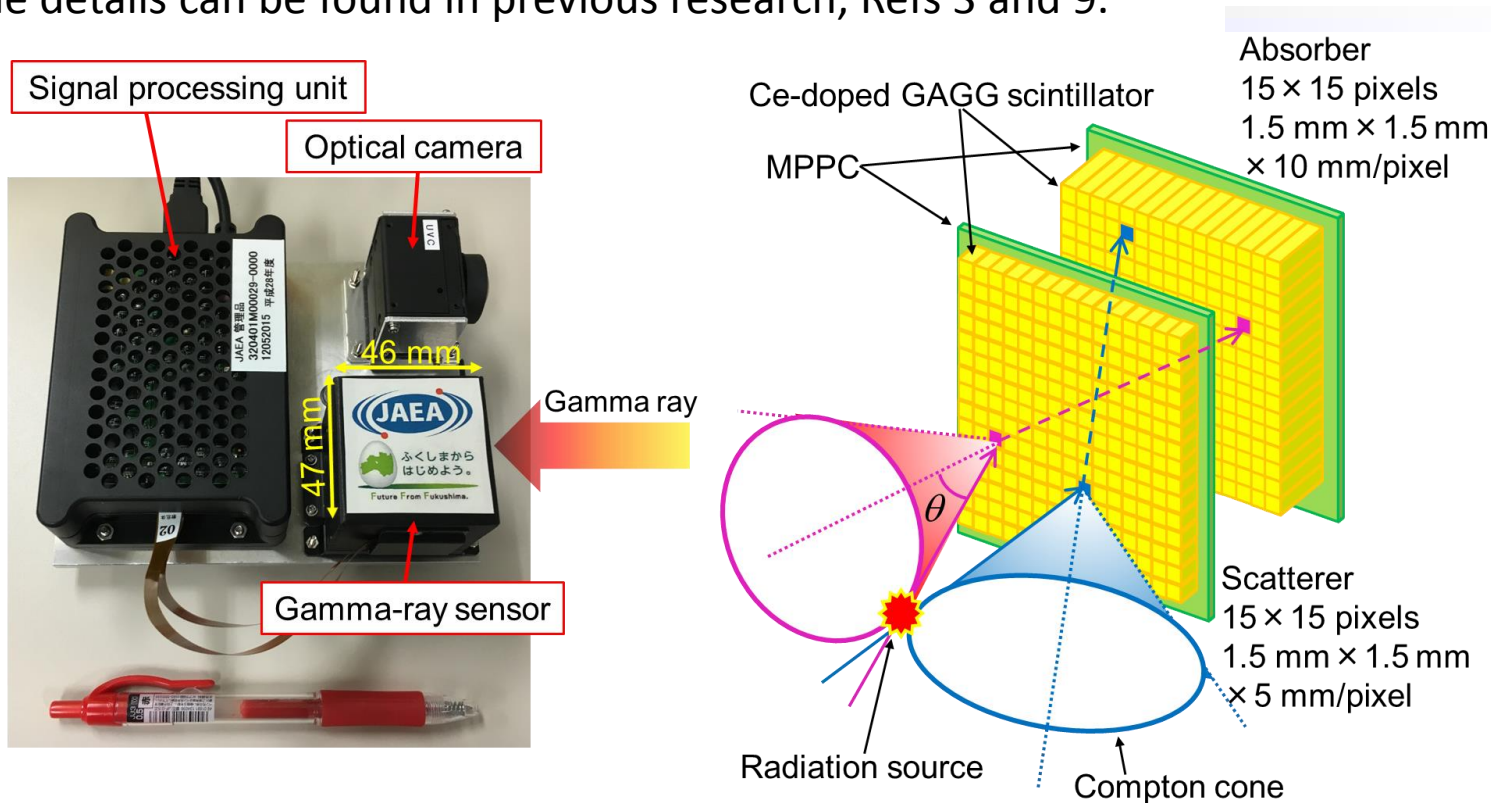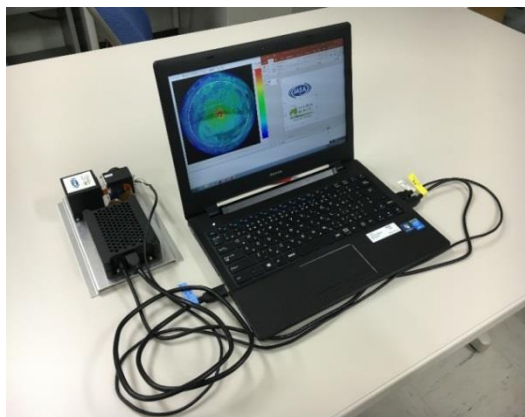

The incident angles of gamma rays on the scatterer are estimated using the kinematics of Compton scattering. The gamma-ray sensor is connected to a signal processing unit that records and processes information about the position of gamma-ray interaction and the energy deposition values in the scatterer and the absorber. The processed signals are sent to a PC via a USB 3.0 port. The sum of power consumption of the signal processing unit and the gamma-ray sensor is less than 5W. Electric power is supplied via a USB bus. Image reconstruction for visualization of the radioactive substances is performed on the PC. The radiation images are reconstructed by a back-projection method by using the data measured with the gamma ray sensor.
